# Supplementary material
Source: Springer Nature journal article supplement (https://www.springermedizin.de/resource/supplementary/12936_2014_3239_MOESM2_ESM.pdf/9545414)

**1st DTR level****2nd DTR level****3rd DTR level****4th 1st DTR level****4-week lag**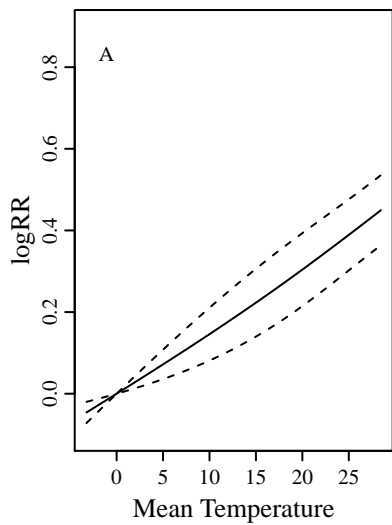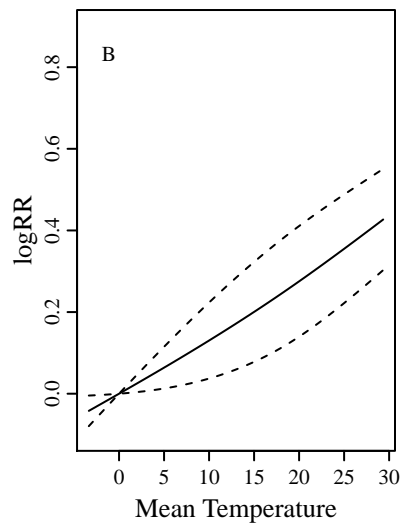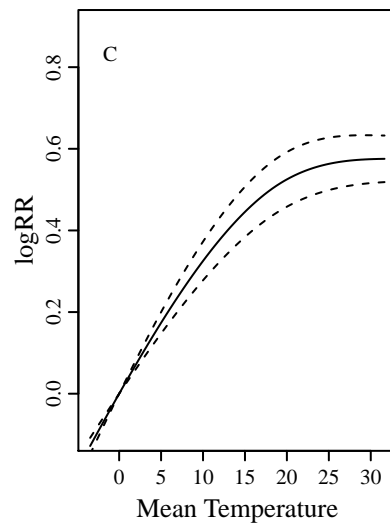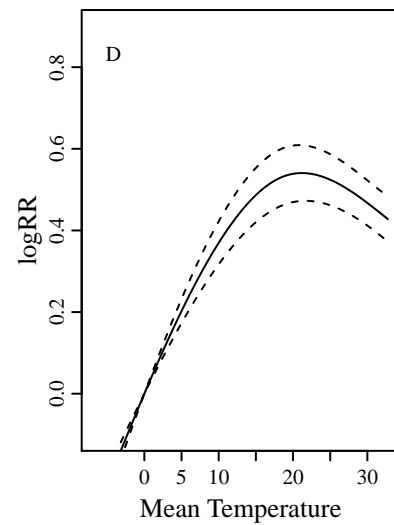**6-week lag**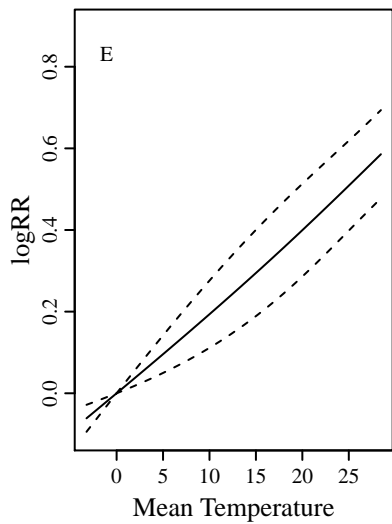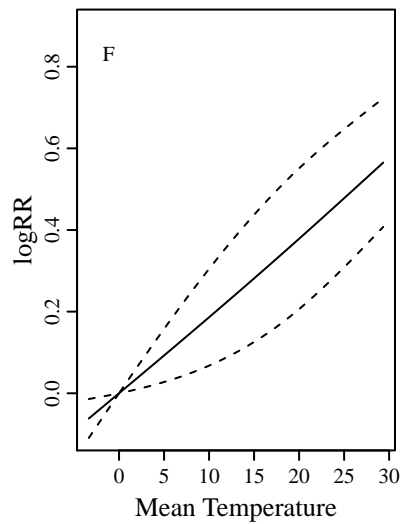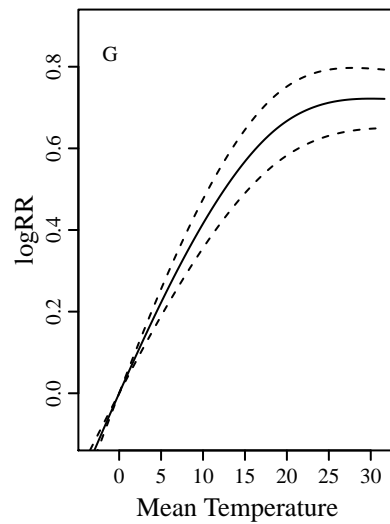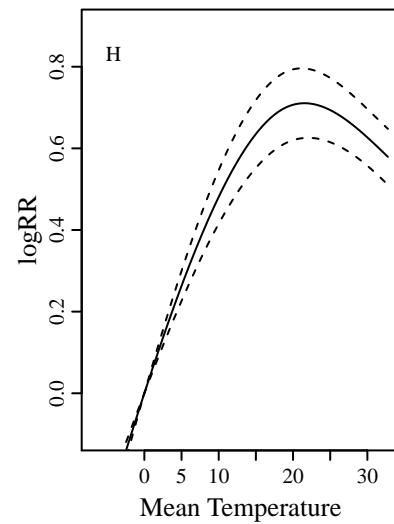**8-week lag**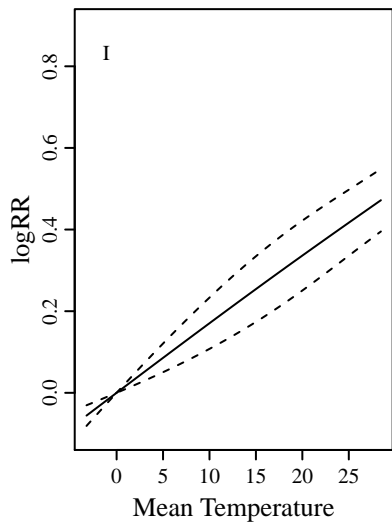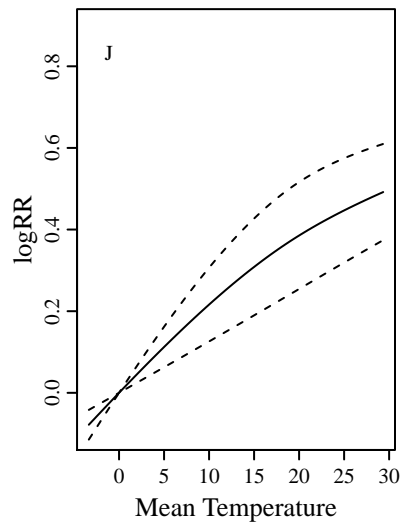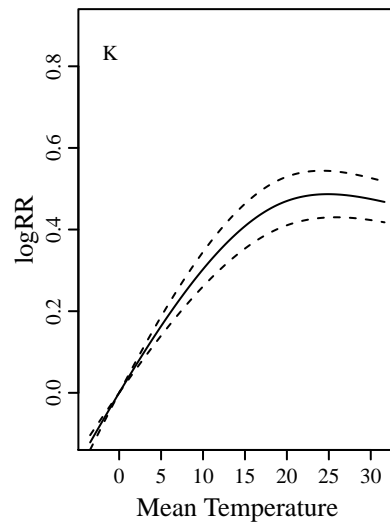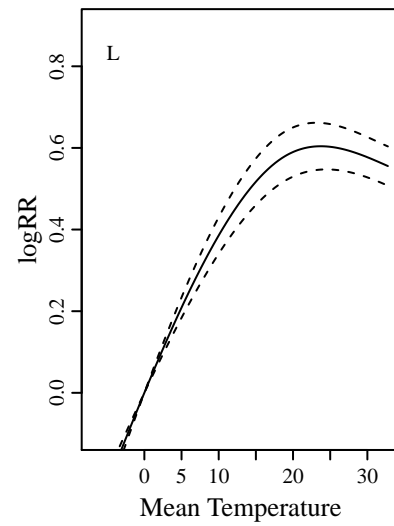

Supplement: MOESM2 [file 9545414]
